# Supplementary material for: Guest-induced reversible structural transitions and concomitant on/off luminescence switching of an Eu(iii) metal–organic framework and its application in detecting picric acid
Source: Royal Society of Chemistry journal article supplement (doi:10.1039/c4nj01946f), 2015-01-01
Supplement: c4nj01946f1.pdf [file c4nj01946f1.pdf]

## Supporting Information for the manuscript

### **Guest-induced reversible structural transitions and concomitant on/off luminescent switch of an Eu(III) metal-organic framework and its application in detecting picric acid**

**Ao Li,<sup>a</sup> Liang Li,<sup>a</sup> Zhi Lin,<sup>c</sup> Lin Song,<sup>a</sup> Zi-Hao Wang,<sup>a</sup> Qiang Chen,<sup>a</sup> Tao Yang,<sup>a</sup> Xin-Hui Zhou,<sup>\*a</sup> Hong-Ping Xiao<sup>\*b</sup> and Xiu-Ju Yin<sup>d</sup>**

*<sup>a</sup>Key Laboratory for Organic Electronics and Information Displays & Institute of Advanced Materials, National Jiangsu Synergetic Innovation Center for Advanced Materials (SICAM), Nanjing University of Posts & Telecommunications, 9 Wenyuan Road, Nanjing 210023, China. E-mail: iamxhzhou@njupt.edu.cn*

*<sup>b</sup>College of Chemistry and Materials Engineering, Wenzhou University, Wenzhou, 325035, China. E-mail: hp\_xiao@126.com*

*<sup>c</sup>Department of Chemistry, CICECO, University of Aveiro, 3810-193 Aveiro, Portugal.*

*<sup>d</sup>School of Chemistry and Biological Engineering, Hechi University, Yizhou, 546300, China.*

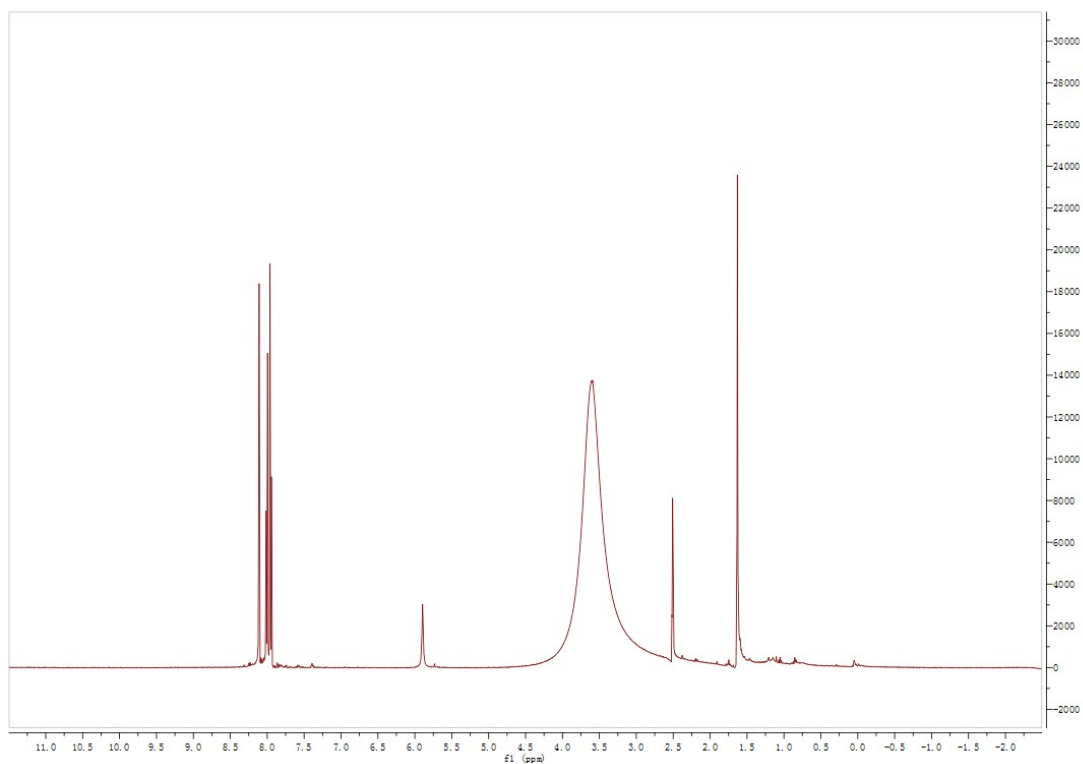

**Fig. S1**  $^1\text{H}$  NMR of  $\text{H}_2\text{MHFDA}$  in  $\text{d}_6\text{-DMSO}$ .

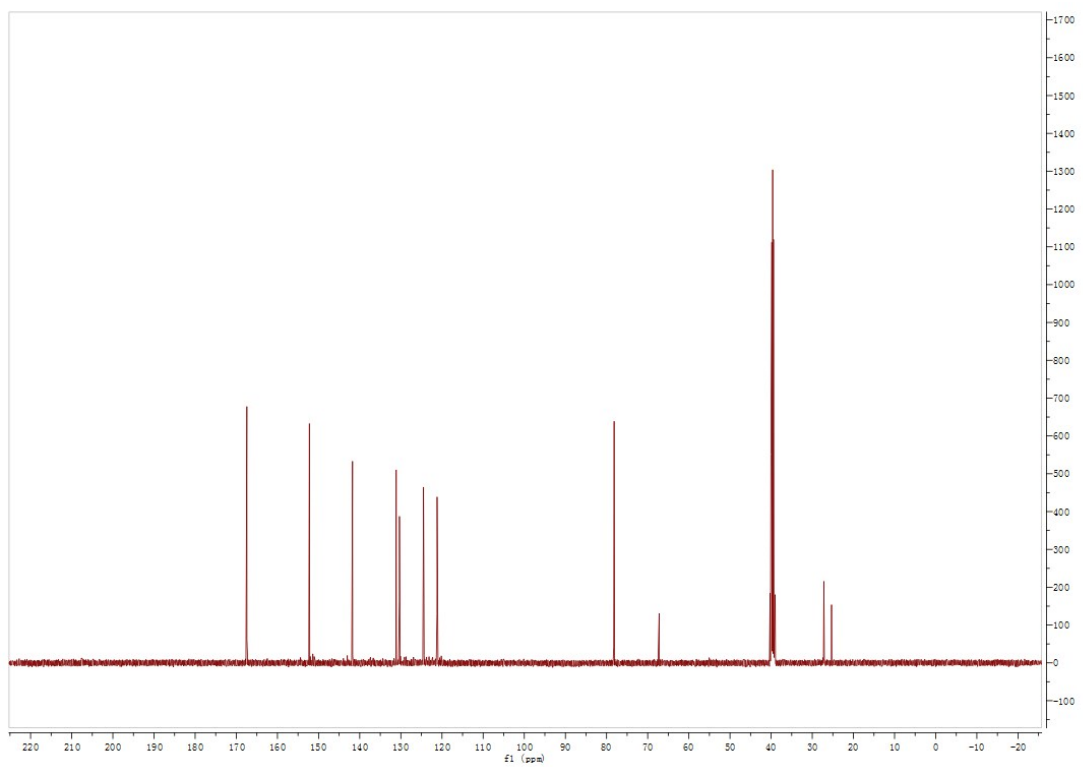

**Fig. S2**  $^{13}\text{C}$  NMR of  $\text{H}_2\text{MHFDA}$  in  $\text{d}_6\text{-DMSO}$ .

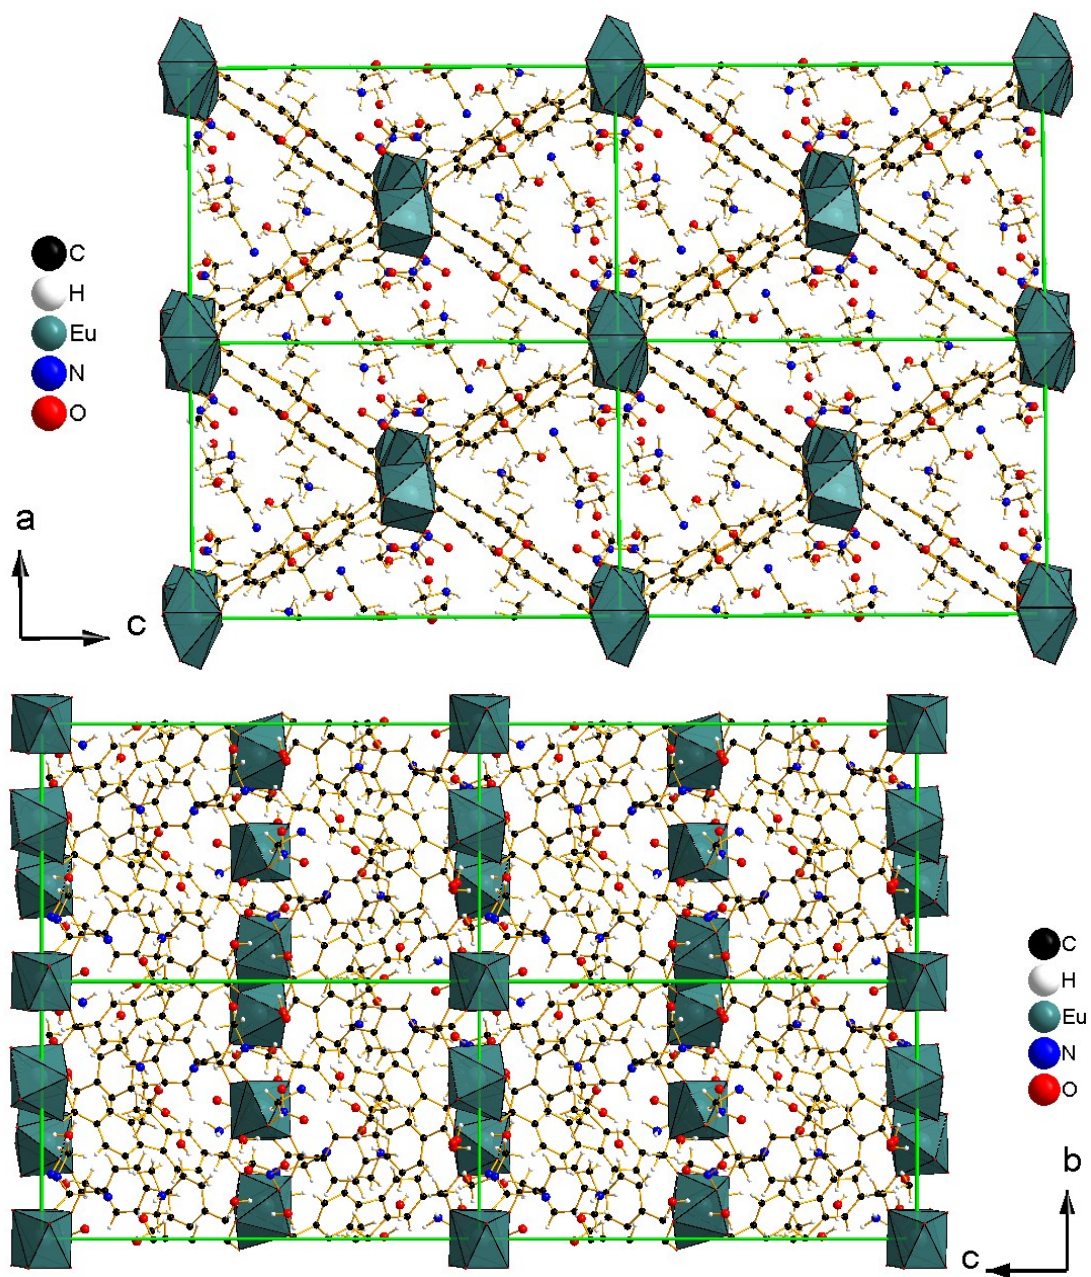

**Fig. S3** Framework of **1** with solvents and cations in channel.



**Fig. S5** The excitation spectra of **1,1a** and **1b** monitored at 614 nm at room temperature.

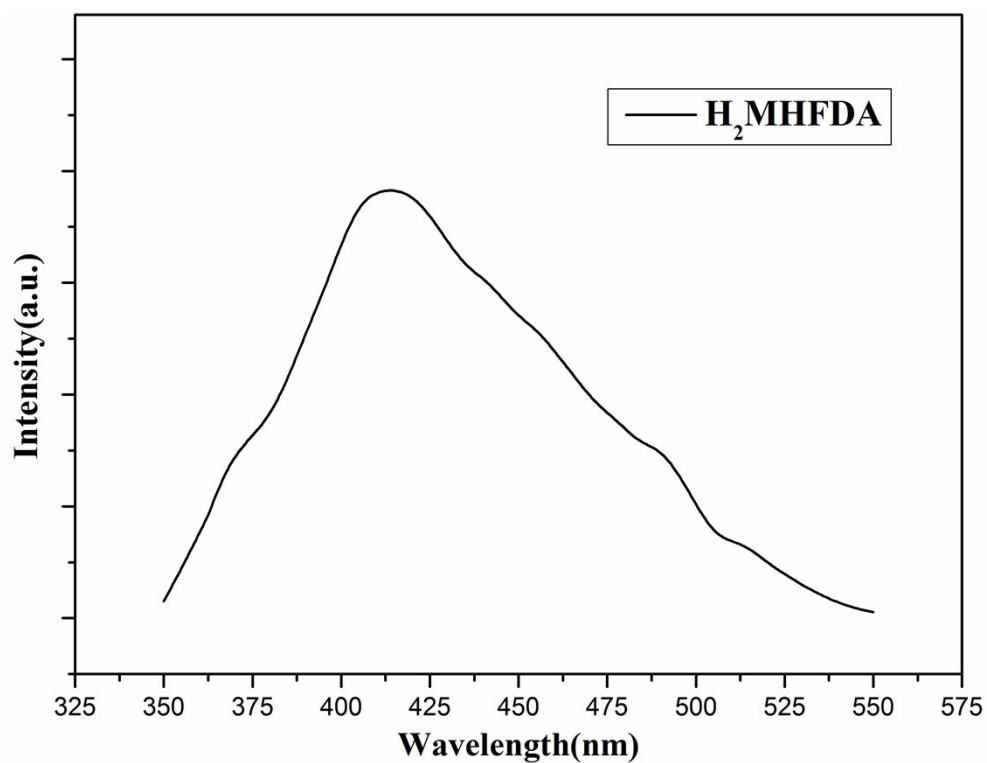

**Fig. S6** The emission spectra of organic ligand H<sub>2</sub>MHFDA in solid state at room temperature. The main emission peaks is at 412nm ( $\lambda_{ex} = 334$  nm).

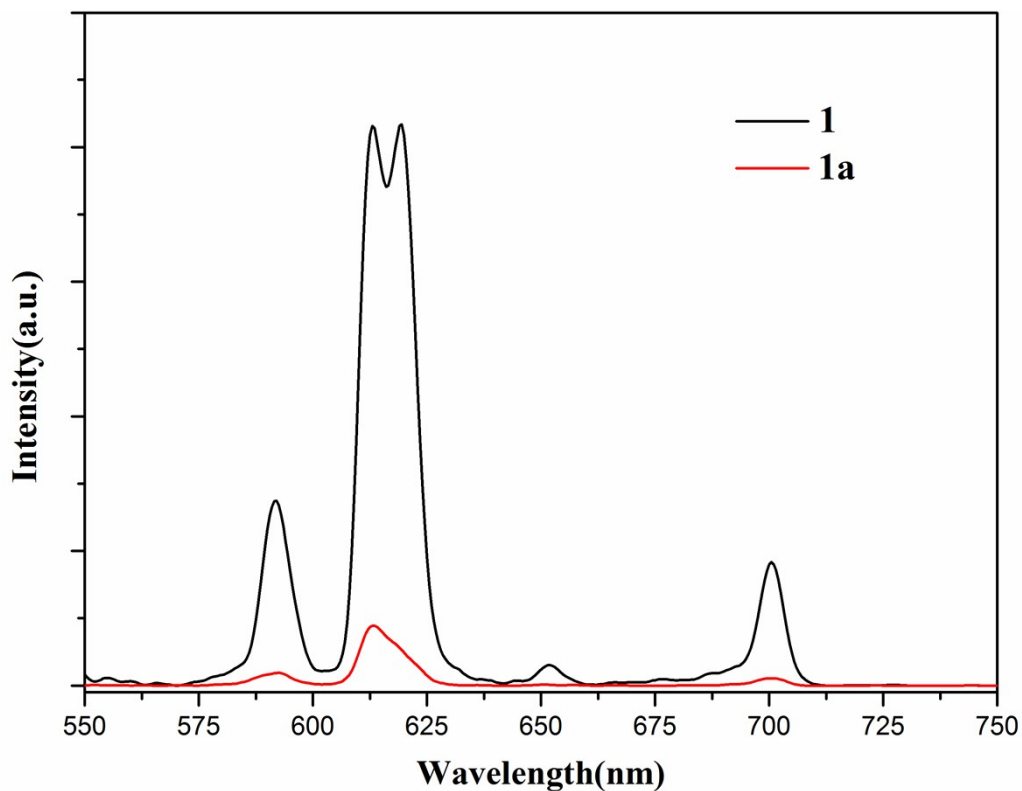

**Fig. S7** The emission spectra of **1** and **1a** activated at 170 °C dispersed in DMSO excited at 340 nm at room temperature.

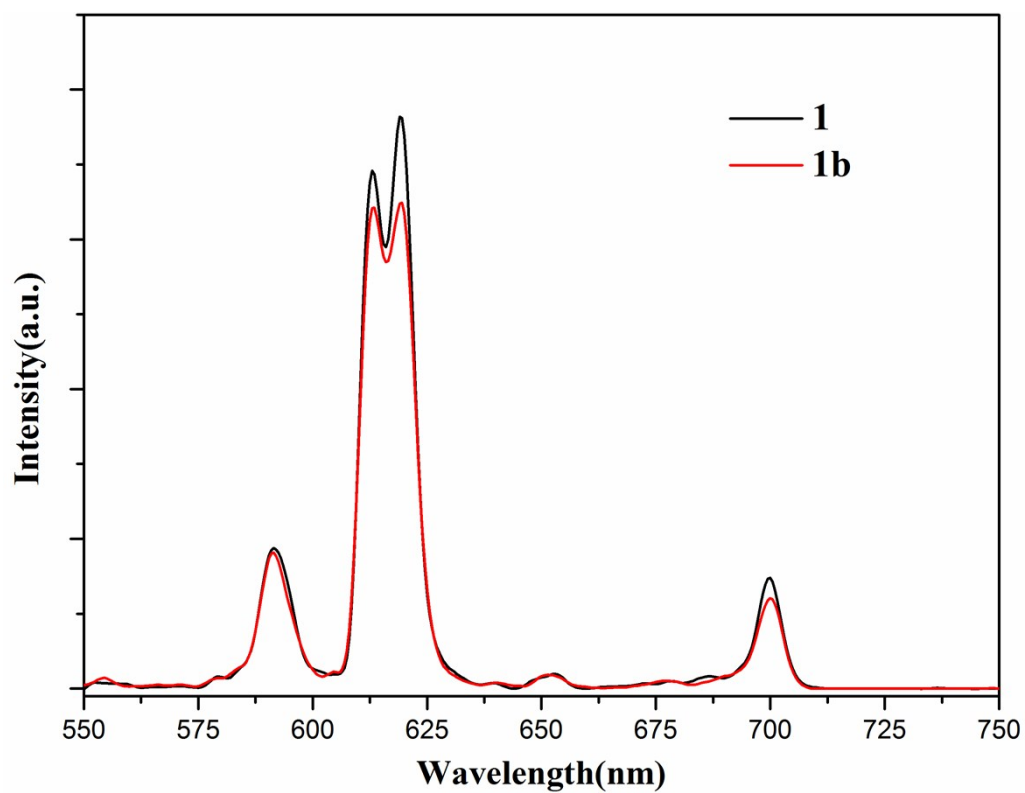

**Fig. S8** The emission spectra of **1** and **1b** dispersed in DMF excited at 340 nm at room temperature.
